# Supplementary material for: Enhancing the electrocatalytic performance of SnX2 (X = S and Se) monolayers for CO2 reduction to HCOOH via transition metal atom adsorption: a theoretical investigation
Source: Royal Society of Chemistry journal article supplement (doi:10.1039/d3ra06692d), 2023-01-01
Supplement: d3ra06692d1.pdf [file d3ra06692d1.pdf]

## Supplementary Information

Enhancing the Electrocatalytic Performance of SnX<sub>2</sub> (X= S and Se)  
Monolayers for CO<sub>2</sub> Reduction to HCOOH via Transition Metal Atom  
Adsorption: A Theoretical Investigation

Feifei Xia<sup>a\*</sup>, Qing Xu<sup>a</sup>, Fengli Yang<sup>a</sup>, Li Shu<sup>a</sup> and Yingpin Wen<sup>a</sup>

*<sup>a</sup>School of Chemistry and Chemical Engineering, Jiangsu University of Technology, Changzhou  
213001, Jiangsu, P. R. China*

E-mail: [ffxia@jsut.edu.cn](mailto:ffxia@jsut.edu.cn).

## Computational details of free energies for CO<sub>2</sub> reduction (CRR)

In this work, the CO<sub>2</sub> reduction to HCOOH was assumed to take place along the following elementary step:

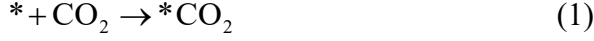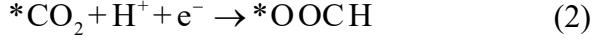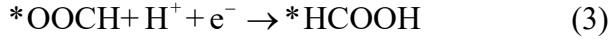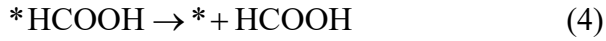

where \* denotes the active site in the SnX<sub>2</sub> (X = S and Se) monolayers, and \*CO<sub>2</sub>, \*OOCH and \*HCOOH represent the adsorbed intermediates that are involved in CRR corresponding to two-electron transfer process. And the Gibbs free energies of these intermediates (\*CO<sub>2</sub>, \*OOCH and \*HCOOH) are calculated by the following equations:

$$\Delta G_{* \text{CO}_2} = G_{* \text{CO}_2} - G_* - G_{\text{CO}_2} \quad (5)$$

$$\Delta G_{* \text{OOCH}} = G_{* \text{OOCH}} - G_* - G_{\text{CO}_2} - \frac{1}{2} G_{\text{H}_2} \quad (6)$$

$$\Delta G_{* \text{HCOOH}} = G_{* \text{HCOOH}} - G_* - G_{\text{CO}_2} - G_{\text{H}_2} \quad (7)$$

where  $G_{* \text{CO}_2}$ ,  $G_{* \text{OOCH}}$  and  $G_{* \text{HCOOH}}$  the free energy of the system with one adsorbed CO<sub>2</sub>, OOH and HCOOH,  $G_*$  is the free energy of the system itself,  $G_{\text{H}_2\text{O}}$ ,  $G_{\text{H}_2}$  and  $G_{\text{CO}_2}$  are the free energy of H<sub>2</sub>O, H<sub>2</sub> and CO<sub>2</sub> molecules, respectively.

To evaluate the catalytic activity, the CRR overpotential ( $\eta$ ) is calculated from the change of free energy in the elementary step and limiting potential ( $U_L$ ) at equilibrium state. And  $\eta$  is defined as  $\eta = U_{\text{equ}} - U_L$ , where  $U_{\text{equ}}$  is the equilibrium potential obtained from experimental data,  $U_L$  is calculated by  $U_L = \frac{-\Delta G_{\text{max}}}{e}$ , and  $\Delta G$  and  $e$  are the difference of free energy of the reaction intermediate and the number of electrons transferred in the reaction. A catalyst with lower overpotential possesses better catalytic activity.

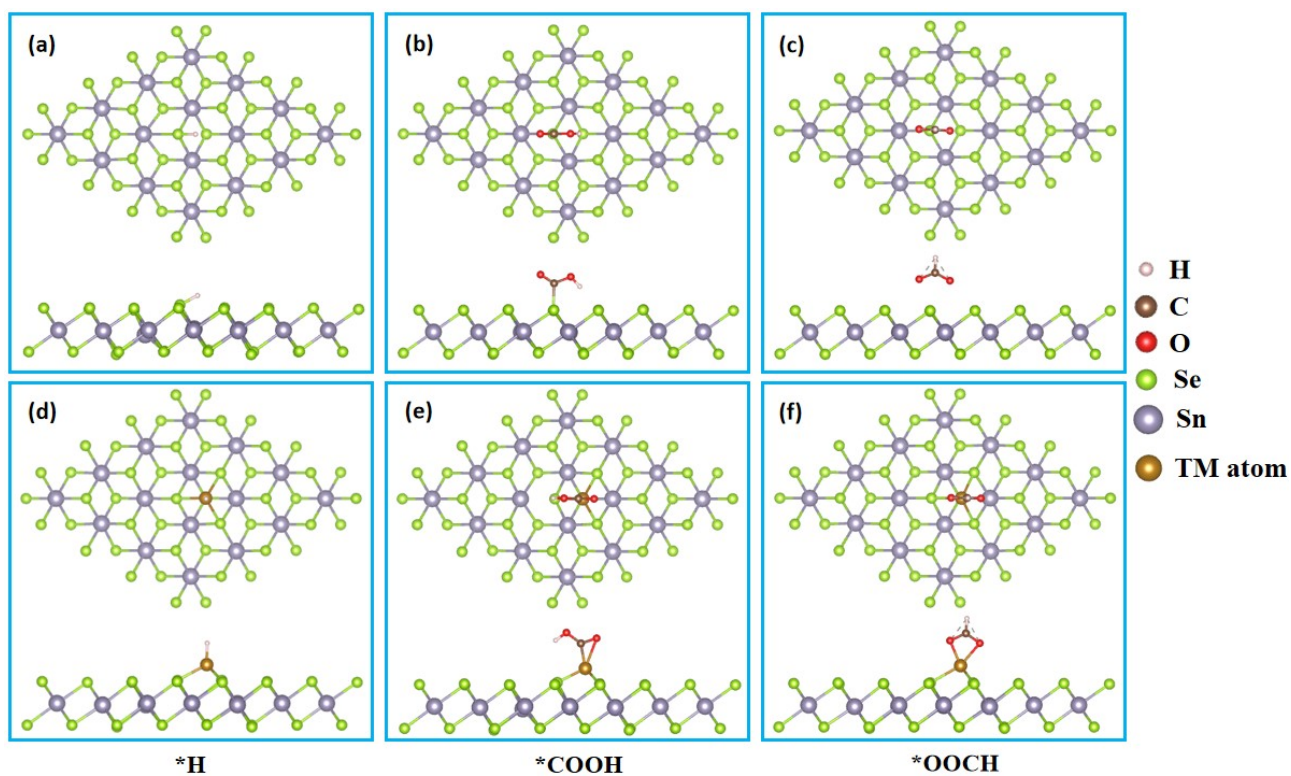

**Figure S1.** Side and top views of key intermediates (\*H, \*COOH and \*OOCH) adsorption on the surface of (a)-(c) pristine SnSe<sub>2</sub> and (d)-(f) TM/SnSe<sub>2</sub> monolayers.

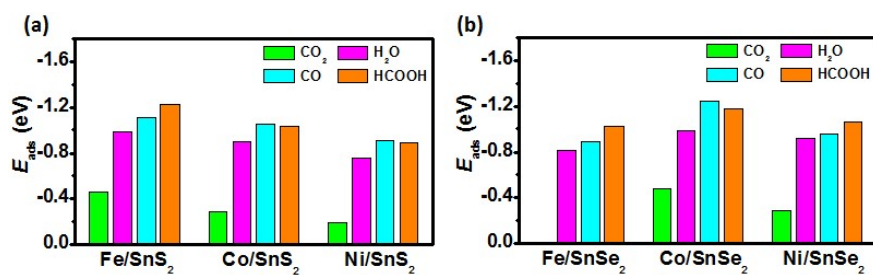

**Figure S2.** The adsorption energies of  $\text{CO}_2$ ,  $\text{H}_2\text{O}$ ,  $\text{CO}$  and  $\text{HCOOH}$  adsorbed on the surface of (a)  $\text{SnS}_2$  and (b)  $\text{SnSe}_2$  monolayers.

**Table S1. The Adsorption Energies for the CO<sub>2</sub>, H<sub>2</sub>O, CO and HCOOH Adsorption on the Surface of SnX<sub>2</sub> (X=S and Se) Monolayers**

| surface                    | Adsorption Energy (eV) |                  |       |       |
|----------------------------|------------------------|------------------|-------|-------|
|                            | CO <sub>2</sub>        | H <sub>2</sub> O | CO    | HCOOH |
| pristine SnS <sub>2</sub>  | -0.13                  | -0.12            | -0.09 | -0.02 |
| Fe/SnS <sub>2</sub>        | -0.46                  | -0.99            | -1.83 | -1.05 |
| Co/SnS <sub>2</sub>        | -0.29                  | -0.90            | -1.77 | -0.85 |
| Ni/SnS <sub>2</sub>        | -0.19                  | -0.76            | -1.63 | -0.71 |
| pristine SnSe <sub>2</sub> | -0.22                  | -0.06            | -0.19 | -0.19 |
| Fe/SnSe <sub>2</sub>       | -0.001                 | -0.81            | -1.61 | -0.84 |
| Co/SnSe <sub>2</sub>       | -0.48                  | -0.99            | -1.97 | -1.01 |
| Ni/SnSe <sub>2</sub>       | -0.29                  | -0.92            | -1.68 | -0.88 |

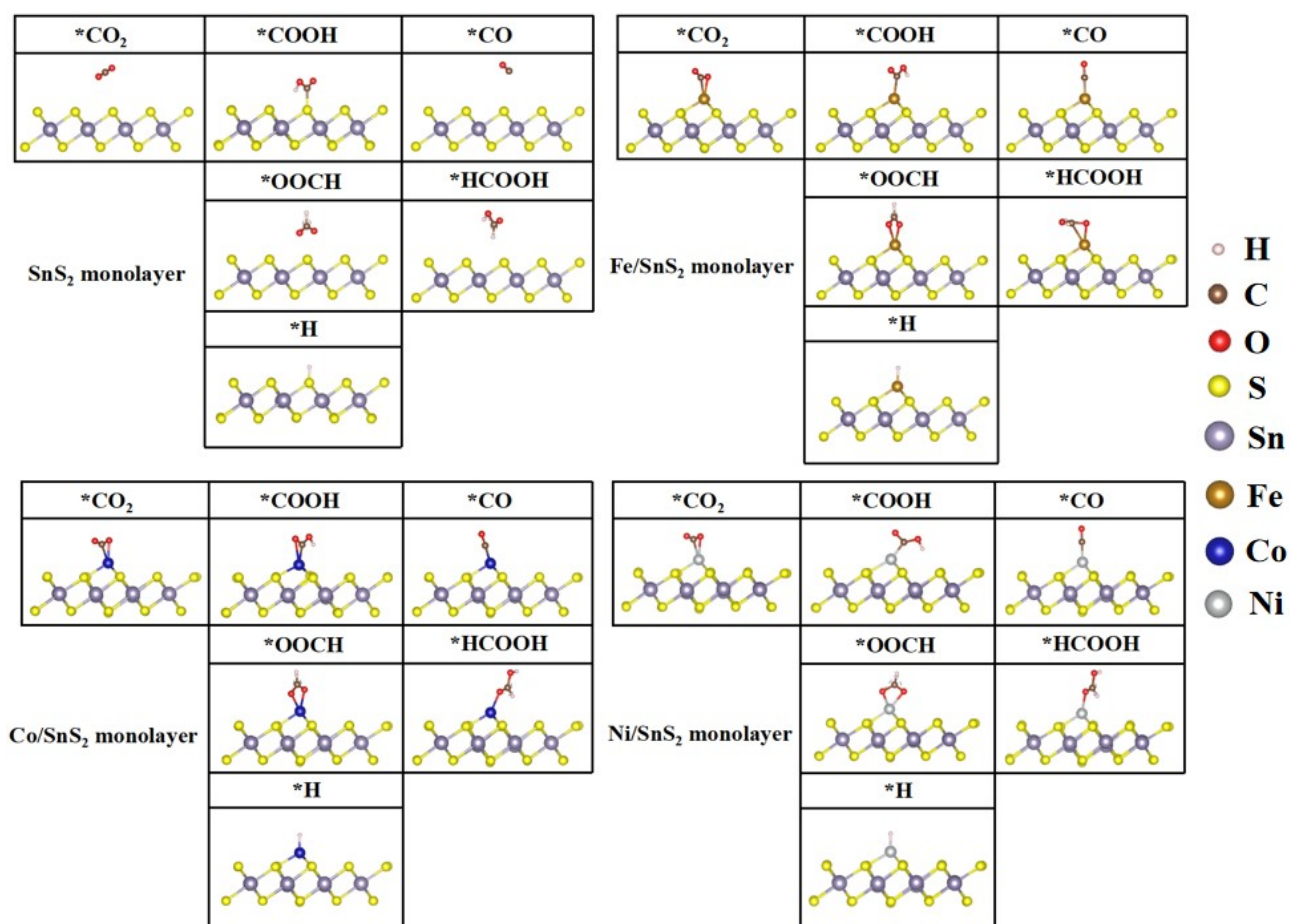

**Figure S3.** Key reaction intermediate species for the CO<sub>2</sub> reduction reaction with two electrons transfer on SnS<sub>2</sub> monolayers.

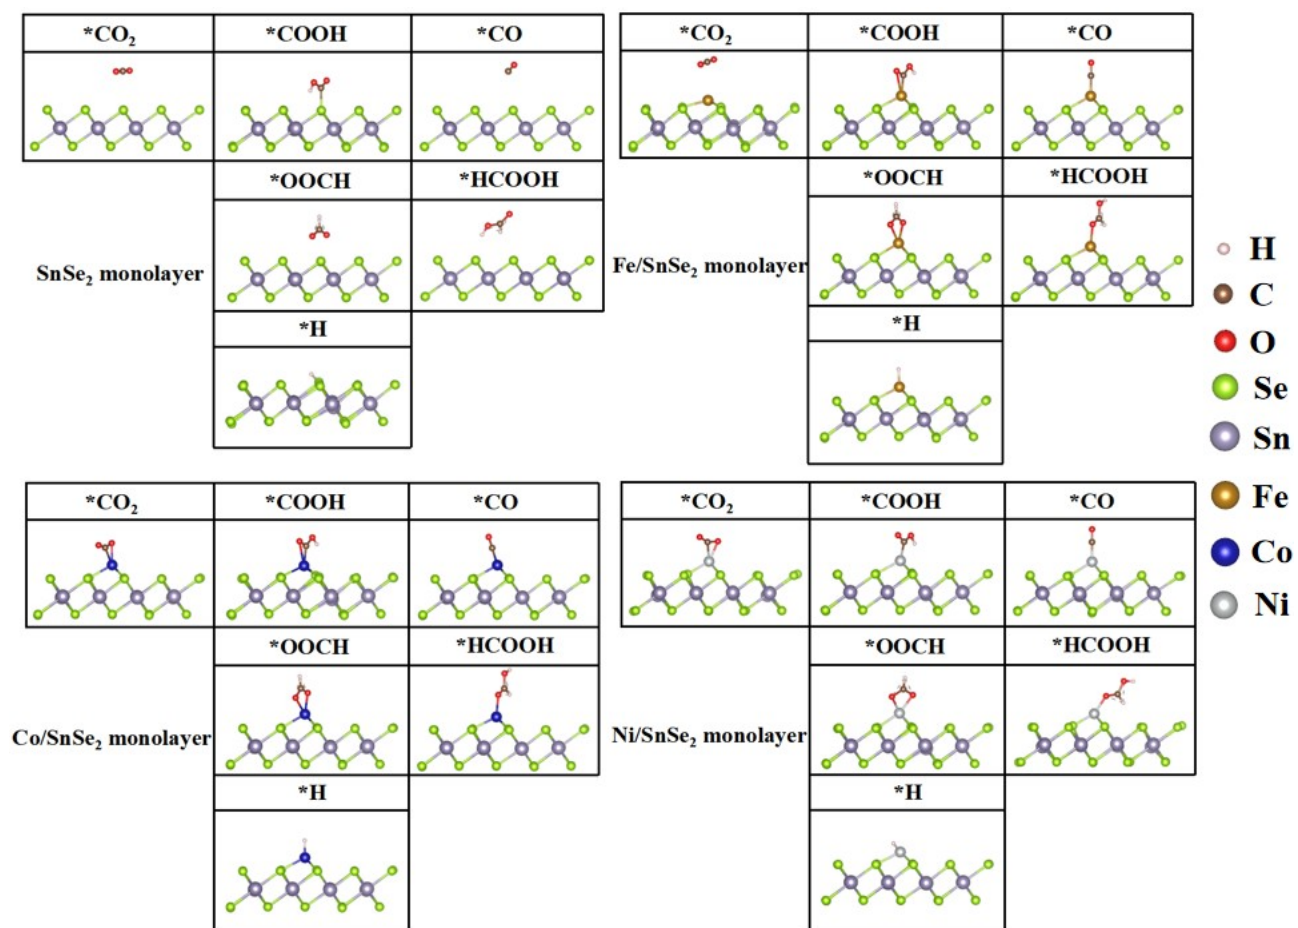

**Figure S4.** Key reaction intermediate species for the CO<sub>2</sub> reduction reaction with two electrons transfer on SnSe<sub>2</sub> monolayers.

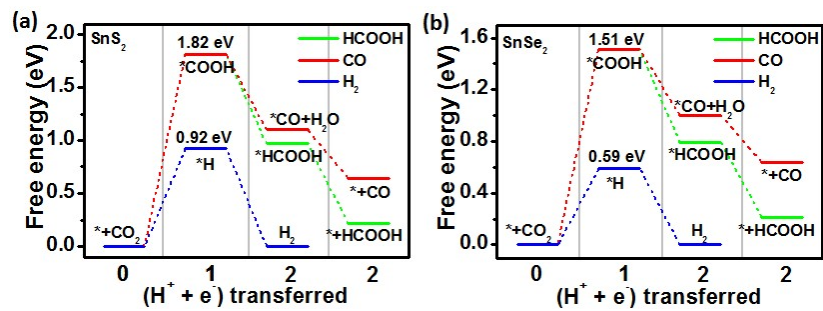

**Figure S5.** Free energy diagram for electroreduction of CO<sub>2</sub> to HCOOH (green), CO (red) and H<sub>2</sub> (blue) on the surface of pristine (a) SnS<sub>2</sub> and (b) SnSe<sub>2</sub> monolayers.



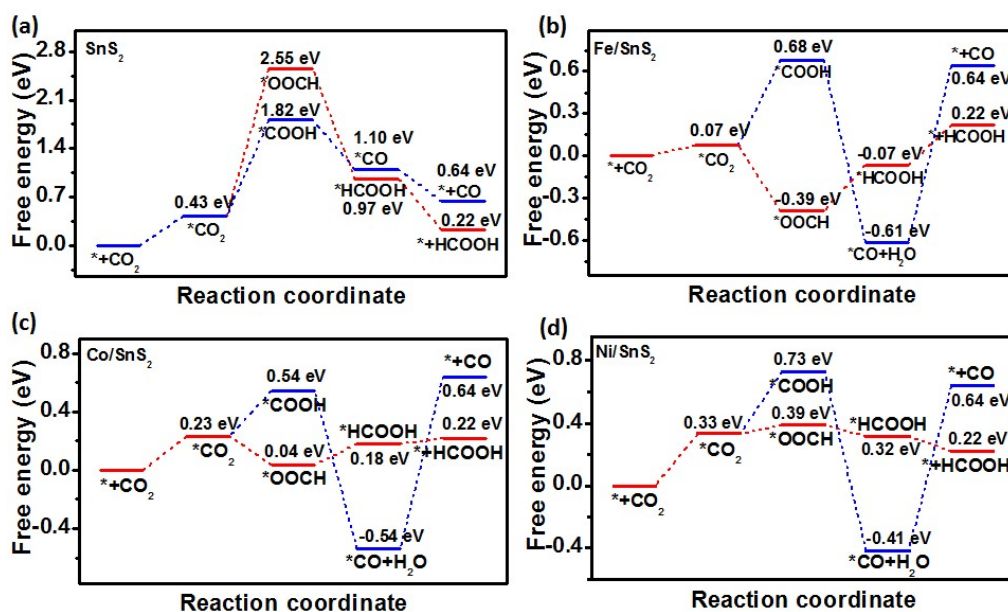

**Figure S6.** Free energy diagram for electroreduction of CO<sub>2</sub> to HCOOH (red line) and CO (blue line) on the surface of (a) pristine SnS<sub>2</sub>, (b) Fe/SnS<sub>2</sub>, (c) Co/SnS<sub>2</sub> and (d) Ni/SnS<sub>2</sub> monolayers.

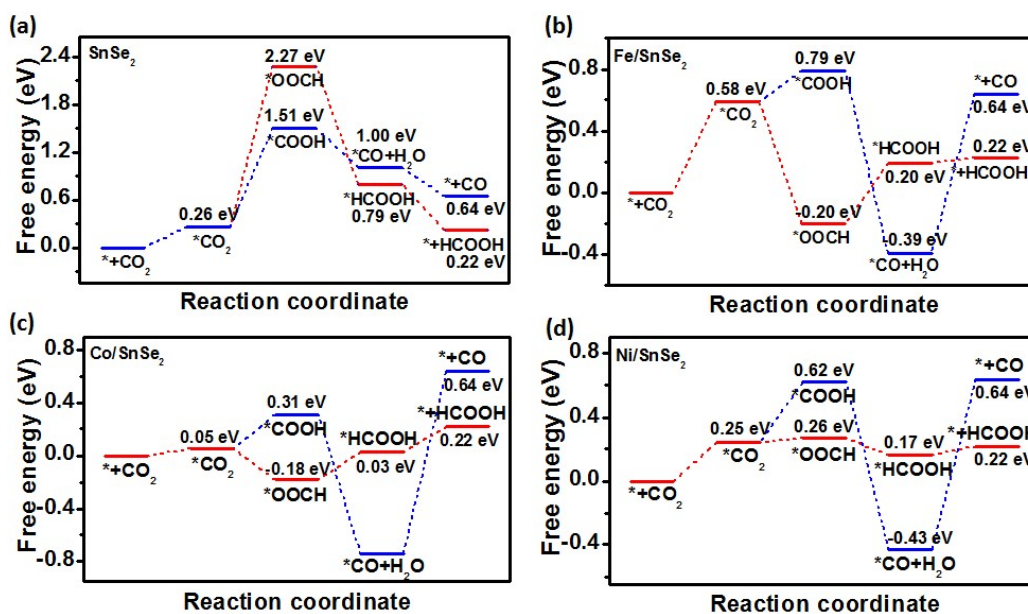

**Figure S7.** Free energy diagram for electroreduction of CO<sub>2</sub> to HCOOH (red line) and CO (blue line) on the surface of (a) pristine SnSe<sub>2</sub>, (b) Fe/SnSe<sub>2</sub>, (c) Co/SnSe<sub>2</sub> and (d) Ni/SnSe<sub>2</sub> monolayers.

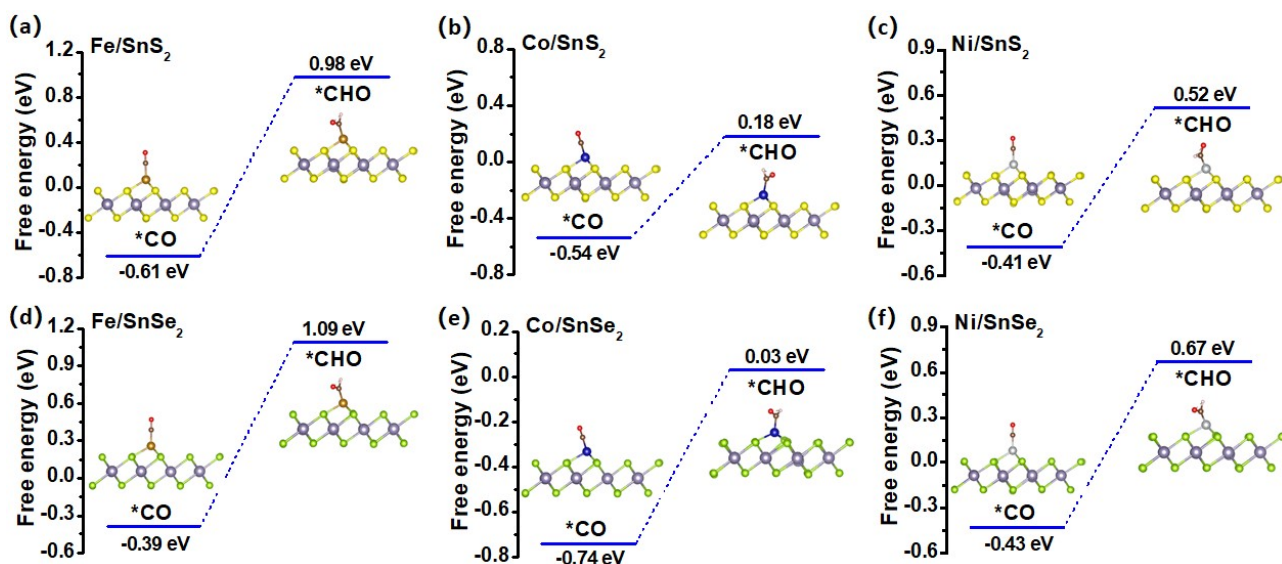

**Figure S8.** The calculated free energy changes of \*CO to \*CHO during the CRR for Fe, Co and Ni adsorbed on (a)-(c) SnS<sub>2</sub> and (d)-(f) SnSe<sub>2</sub> monolayers.

The \*CO intermediate added one H<sup>+</sup> and one e can form \*CHO intermediate during the CO<sub>2</sub> reduction reaction (CRR). And the Gibbs free energy of \*CHO is calculated by the equation of  $\Delta G_{*CHO} = G_{*CHO} + G_{H_2O} - G_* - G_{CO_2} - \frac{1}{2}G_{H_2}$ , where  $G_{*CHO}$  the free energy of the system with one adsorbed CHO,  $G_*$  is the free energy of the system itself,  $G_{H_2O}$ ,  $G_{H_2}$  and  $G_{CO_2}$  are the free energy of H<sub>2</sub>O, H<sub>2</sub> and CO<sub>2</sub> molecules, respectively. Our calculated results show that the free energy barrier (from \*CO + H<sup>+</sup> + e to \*CHO) is high in this protonation step during CRR for TM/SnX<sub>2</sub> (X= S and Se) monolayers (shown in Figure S8), indicating unfavorable formation of formaldehyde and methanol product. Moreover, the first protonation step (\* + CO<sub>2</sub> + H<sup>+</sup> + e to \*COOH) of TM/SnX<sub>2</sub> (X= S and Se) monolayers is endothermic and the free energy barrier is high, suggesting the difficulty of this process.

**Table S2. The Potential Determining Steps (PDS), Limiting Potentials  $U_L$  (V) and Overpotentials ( $\eta$ /V) for CO<sub>2</sub> Reduction to CO on the Different Surface of SnX<sub>2</sub> (X=S and Se)**

**Monolayers**

| <b>surface</b>                   | <b>PDS</b>                              | <b><math>U_L</math></b> | <b><math>\eta</math></b> |
|----------------------------------|-----------------------------------------|-------------------------|--------------------------|
| <b>pristine SnS<sub>2</sub></b>  | <b>*CO<sub>2</sub>→*COOH</b>            | <b>-1.39</b>            | <b>1.27</b>              |
| <b>Fe/SnS<sub>2</sub></b>        | <b>*CO→CO</b>                           | <b>-1.25</b>            | <b>1.13</b>              |
| <b>Co/SnS<sub>2</sub></b>        | <b>*CO→CO</b>                           | <b>-1.18</b>            | <b>1.06</b>              |
| <b>Ni/SnS<sub>2</sub></b>        | <b>*CO→CO</b>                           | <b>-1.05</b>            | <b>0.93</b>              |
| <b>pristine SnSe<sub>2</sub></b> | <b>*CO<sub>2</sub>→*COOH</b>            | <b>-1.24</b>            | <b>1.12</b>              |
| <b>Fe/SnSe<sub>2</sub></b>       | <b>*+CO<sub>2</sub>→*CO<sub>2</sub></b> | <b>-1.03</b>            | <b>0.91</b>              |
| <b>Co/SnSe<sub>2</sub></b>       | <b>*CO→CO</b>                           | <b>-1.38</b>            | <b>1.26</b>              |
| <b>Ni/SnSe<sub>2</sub></b>       | <b>*CO→CO</b>                           | <b>-1.07</b>            | <b>0.95</b>              |

**Table S3. The Limiting Potentials  $U_L$  (V) and Overpotentials ( $\eta/V$ ) for CRR and HER on the Different Surface of  $\text{SnX}_2$  (X=S and Se) Monolayers**

| surface                                    | $U_L/V(\text{HCOOH})$ | $\eta/V(\text{HCOOH})$ | $U_L/V(\text{CO})$ | $\eta/V(\text{CO})$ | $U_L/V(\text{H}_2)$ |
|--------------------------------------------|-----------------------|------------------------|--------------------|---------------------|---------------------|
| <b>pristine <math>\text{SnS}_2</math></b>  | -1.39                 | 1.19                   | -1.39              | 1.27                | -0.92               |
| <b>Fe/<math>\text{SnS}_2</math></b>        | -0.32                 | 0.12                   | -1.25              | 1.13                | -0.31               |
| <b>Co/<math>\text{SnS}_2</math></b>        | -0.23                 | 0.03                   | -1.18              | 1.06                | -0.49               |
| <b>Ni/<math>\text{SnS}_2</math></b>        | -0.33                 | 0.13                   | -1.05              | 0.93                | -0.80               |
| <b>pristine <math>\text{SnSe}_2</math></b> | -1.24                 | 1.04                   | -1.24              | 1.12                | -0.59               |
| <b>Fe/<math>\text{SnSe}_2</math></b>       | -0.59                 | 0.39                   | -1.03              | 0.91                | -0.47               |
| <b>Co/<math>\text{SnSe}_2</math></b>       | -0.21                 | 0.01                   | -1.38              | 1.26                | -0.30               |
| <b>Ni/<math>\text{SnSe}_2</math></b>       | -0.25                 | 0.05                   | -1.07              | 0.95                | -0.45               |
